# Supplementary material for: Stomatal CO2/bicarbonate sensor consists of two interacting protein kinases, Raf-like HT1 and non-kinase-activity requiring MPK12/MPK4
Source: Sci Adv. 2022 Dec 7;8(49):eabq6161. doi: 10.1126/sciadv.abq6161 (PMC9728965; doi:10.1126/sciadv.abq6161)
Supplement: Supplementary file 2 — Figs. S1 to S9 Tables S1 to S3 [file sciadv.abq6161_sm.pdf]

Supplementary Materials for  
**Stomatal CO<sub>2</sub>/bicarbonate sensor consists of two interacting protein kinases,  
Raf-like HT1 and non-kinase activity requiring MPK12/MPK4**

Yohei Takahashi *et al.*

Corresponding author: Yohei Takahashi, [ytakahashi@ucsd.edu](mailto:ytakahashi@ucsd.edu); Julian I. Schroeder, [jischroeder@ucsd.edu](mailto:jischroeder@ucsd.edu)

*Sci. Adv.* **8**, eabq6161 (2022)  
DOI: 10.1126/sciadv.abq6161

**This PDF file includes:**

Figs. S1 to S9  
Tables S1 to S3

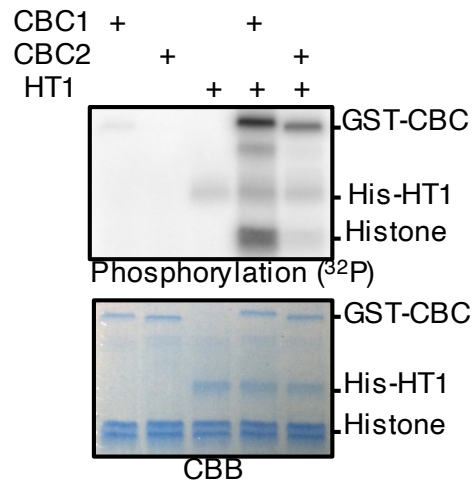

**Fig. S1. The Raf-like kinase CBC proteins are phosphorylated by HT1 protein kinase.**  
*In vitro* phosphorylation analyses were performed using recombinant CBC1 and CBC2 proteins in the presence or absence of HT1. Histone was used as an artificial phosphorylation substrate of CBC1 (see main manuscript).

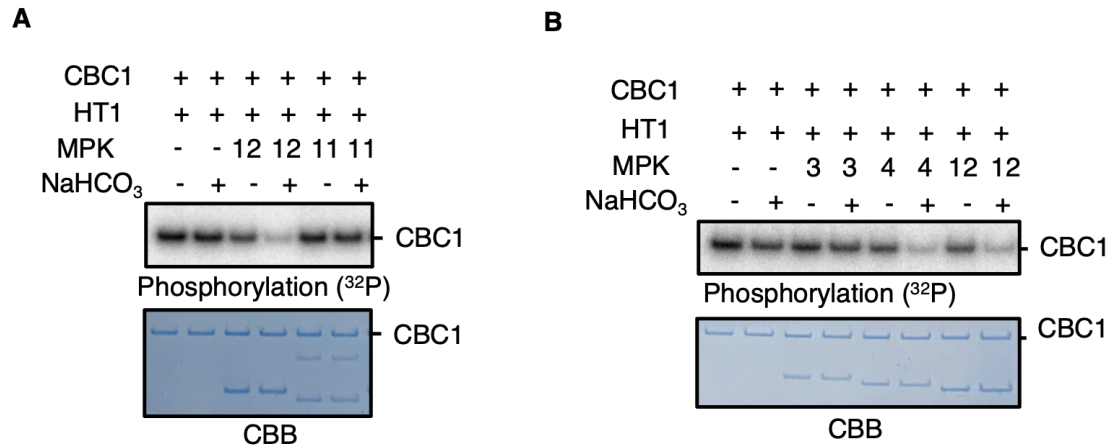

**Fig. S2. MPK11 and MPK3 do not mediate NaHCO<sub>3</sub>-induced inhibition of CBC1 phosphorylation by HT1 *in vitro*.**

(A) His-HT1 and GST-CBC1 proteins were incubated with His-MPK12 or His-MPK11 protein with or without NaHCO<sub>3</sub> for 30 min, and *in vitro* phosphorylation assays were performed.

(B) His-HT1 and GST-CBC1 proteins were incubated with His-MPK3, His-MPK4 or His-MPK12 protein with or without NaHCO<sub>3</sub> for 30 min, and *in vitro* phosphorylation assays were performed.

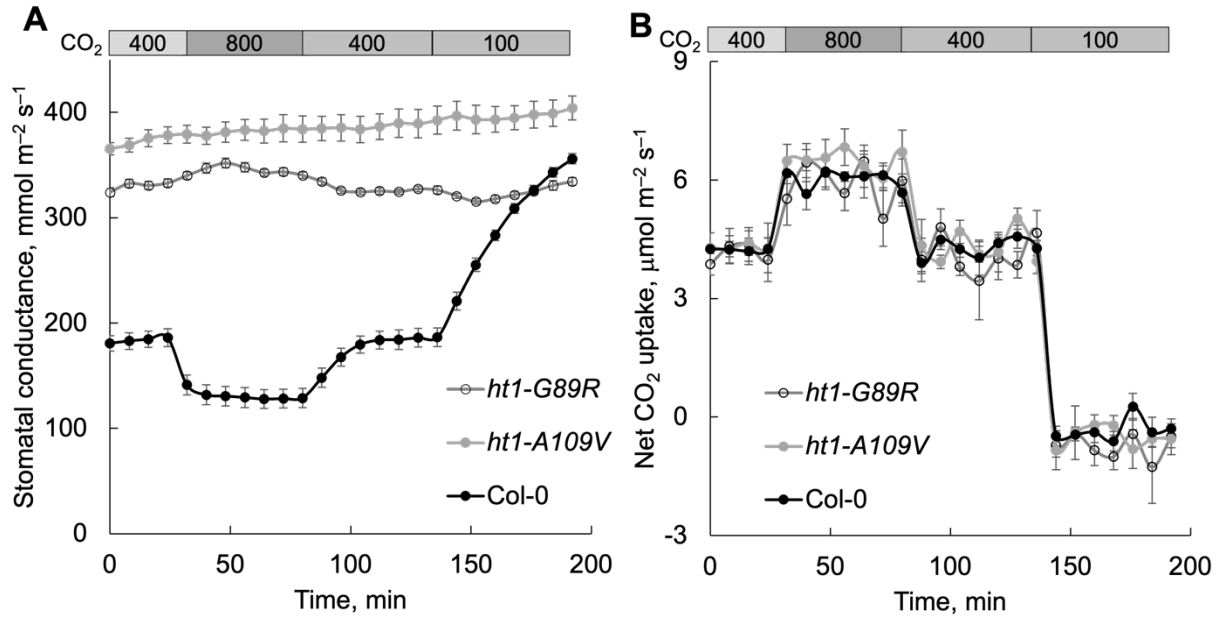

**Fig. S3. Whole plant stomatal conductance measurements in the *ht1-G89R* mutant and the *ht1-A109V* mutant.**

(A) Whole plant gas exchange analyses of Col-0, *ht1-G89R* and *ht1-A109V*. Ambient CO<sub>2</sub> concentrations are indicated by the top bars. n = 6 for *ht1-G89R*, n = 4 for *ht1-A109V*, and n = 4 for Col-0. Error bars show  $\pm$  SEM.

(B) Net CO<sub>2</sub> uptake of plants analyzed in (A).

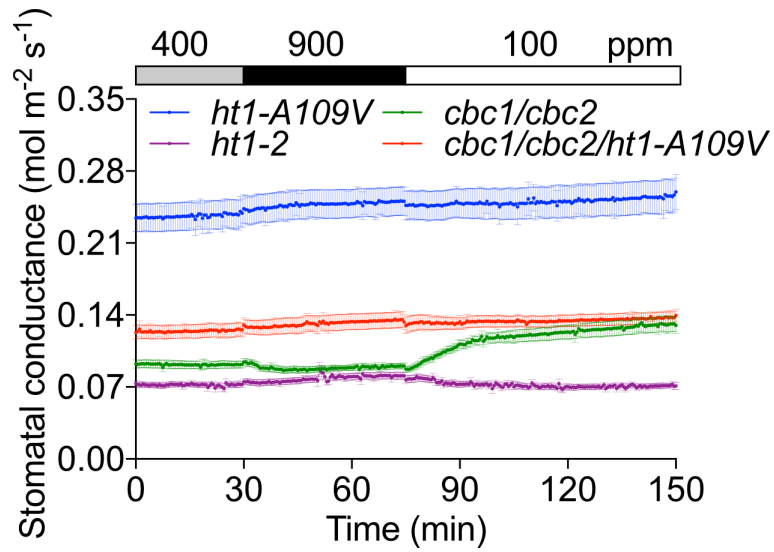

**Fig. S4. *CBC1* and *CBC2* are epistatic to *HT1*.**

Time-resolved stomatal conductance responses to ambient CO<sub>2</sub> concentration changes in *ht1-A109V*, *ht1-2*, *cbc1/cbc2* double, and *cbc1/cbc2/ht1-A109V* triple mutants measured with a LI-6800 gas exchange analyzer (Li-Cor Inc.). Ambient CO<sub>2</sub> concentrations are shown on the top of traces. n = 7 intact leaves attached to independent intact plants for each genotype. Data represent mean ± SEM.

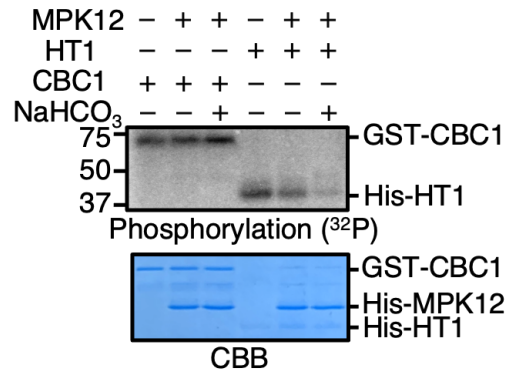

**Fig. S5. Replicate example of NaHCO<sub>3</sub>-dependent HT1 inhibition in the presence of MPK12.**

Replicate of *in vitro* phosphorylation assays using HT1 and CBC1 or MPK12 proteins with or without 20 mM NaHCO<sub>3</sub> or 20 mM NaCl (“-” controls). See Figure 4B for an independent experiment with both MPK4 and MPK12. Note that radiography gels in Figure S5 were exposed for a long period of 15 hours, in order to resolve the basal activity of the CBC1 protein kinase here.

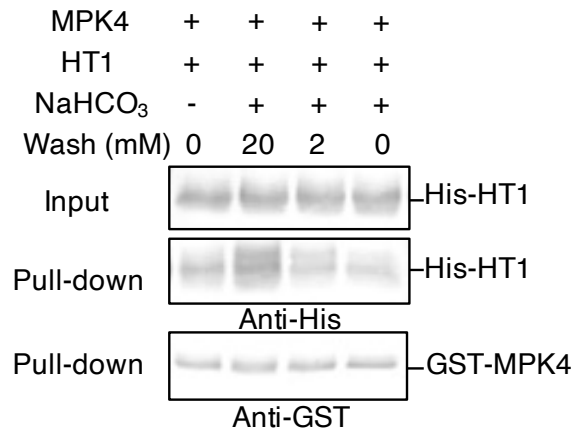

**Fig. S6. Repeat experiment example of reversible interaction between MPK4 and HT1 *in vitro*.**

*In vitro* pull-down assays using recombinant GST-MPK4 and His-HT1 proteins were performed with or without 20 mM NaHCO<sub>3</sub>. Precipitated proteins were washed with buffers supplemented with NaHCO<sub>3</sub> at the indicated concentrations (0, 2 or 20 mM). See Figure 4E for an independent experiment. To control for effects of Na<sup>+</sup>, 20 mM NaCl (0 mM NaHCO<sub>3</sub>) for lanes 1 and 4 were included in the buffers; and 18 mM NaCl (2 mM NaHCO<sub>3</sub>) for lane 3 were included in the buffer.

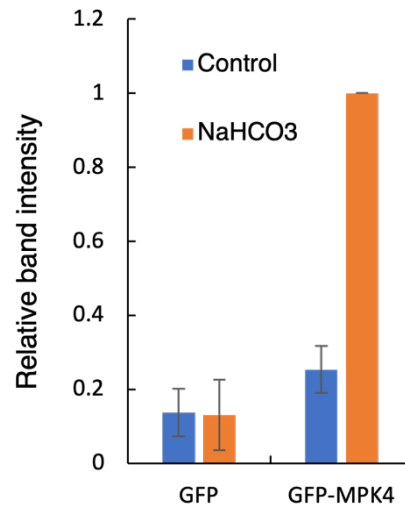

**Fig. S7 Quantification of  $\text{NaHCO}_3$ -dependent interaction between MPK4 and HT1 in *Arabidopsis* mesophyll cell protoplasts.**

Normalized co-immunoprecipitated HT1-FLAG protein band intensities as shown in Figure 4I were measured using ImageJ (version: 2.00-rc-43/1.50e),  $n = 3$  experiments, error bars show  $\pm$ s.e.m.

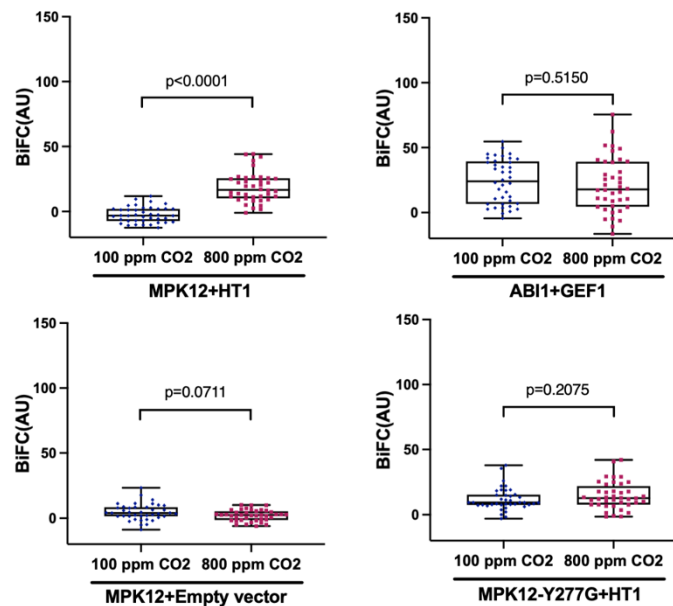

**Fig. S8 The MPK12-Y277G mutation reduces CO<sub>2</sub>-induced interaction between MPK12 and HT1 in *in planta* BiFC assays.**

Beeswarm Box plots of inoculant-blinded BiFC image intensities indicates enhanced interactions of MPK12 and HT1 when plants were exposed to 800 ppm CO<sub>2</sub>, compared to 100 ppm CO<sub>2</sub>. In contrast, positive control ABI1 – GEF1 (25) interaction assays and MPK12 – empty vector negative controls, showed no clear difference among CO<sub>2</sub> concentrations. Inoculants were blinded to the experimenter and unblinded by a different person after the experimenter had analyzed all images. Data were normalized to the background autofluorescence by subtracting average control fluorescence from measured fluorescence intensities. Statistical analysis of the BiFC data was performed using paired t tests (two tailed). Ten images were analyzed for each condition and four non-overlapping areas were analyzed for each image. Note that negative fluorescence intensities reflect images in which the average background fluorescence slightly exceeded measured fluorescence intensities. All graphs and statistical analyses were performed using GraphPad Prism Software (version 9.0.0).



|       | Mutabind2 $\Delta\Delta G$ (kcal/mol) |      |      |      | GeoPPI $\Delta\Delta G$ (kcal/mol) |       |       |       | MOE $\Delta\Delta G$ (kcal/mol) |       |       |       |
|-------|---------------------------------------|------|------|------|------------------------------------|-------|-------|-------|---------------------------------|-------|-------|-------|
|       | AF                                    | 1    | 2    | 3    | AF                                 | 1     | 2     | 3     | AF                              | 1     | 2     | 3     |
| G89R  | 2.02                                  | 2.29 | 1.32 | 1.14 | -0.45                              | -0.21 | -0.36 | -0.16 | 2.42                            | -0.04 | 1.98  | -0.09 |
| R102K | 1.15                                  | 0.75 | 1.36 | 0.86 | 1.07                               | 0.68  | 0.4   | -0.22 | 1.39                            | 2.22  | 0.48  | 1.57  |
| A109V | 0.51                                  | 0.62 | 0.81 | 0.91 | -0.55                              | -0.94 | -0.65 | -0.74 | 0.17                            | 0.24  | -0.09 | 0.03  |
| R173Q | 1.02                                  | 0.55 | 0.71 | 0.97 | 1.22                               | 0.96  | 0.57  | 0.82  | 1.54                            | 0.9   | 1.34  | 0.77  |

**Table S1. Prediction of binding affinity between MPK12 and dominant mutant HT1 isoforms.**

Predicted free energy change of four selected mutations in HT1 (G89R, R102K, A109V, R173Q) using three different programs (Mutabind2, GeoPPI, MOE). Positive values indicate an increased free energy (and thus a predicted destabilization of the complex). These predictions were made using the AlphaFold2 structure (AF in the table) and the first, second and third cluster from the Gaussian-accelerated molecular dynamics (GaMD) simulations (noted as 1, 2, and 3, respectively) (see Methods for details).

| mutation | Mutabind2                     | GeoPPI | MOE   | lowmode | protein |
|----------|-------------------------------|--------|-------|---------|---------|
|          | $\Delta$ stability (kcal/mol) |        |       |         |         |
| Y277G    | 2.13                          | 1.72   | 3.79  | 4       | MPK12   |
| L83G     | 0.96                          | 1.18   | 3.69  | 3.86    | HT1     |
| L213G    | 0.81                          | 0.47   | 3.85  | 3.54    | MPK12   |
| L86G     | 0.79                          | 1.47   | 4     | 3.46    | HT1     |
| W206G    | 2.31                          | 1.9    | 3.68  | 3.45    | MPK12   |
| L281G    | 1.52                          | 0.73   | 3.7   | 3.41    | MPK12   |
| Y277P    | 2.36                          | 1.49   | 3.87  | 3.28    | MPK12   |
| L212G    | 1.55                          | 0.96   | 4.47  | 3.24    | MPK12   |
| F6S      | 0.74                          | 0.9    | 3.66  | 2.71    | HT1     |
| L212D    | 1.07                          | 0.79   | 3.88  | 2.51    | MPK12   |
| R173Q    | 0.55                          | 0.96   | 0.9   | 2.12    | HT1     |
| R102K    | 0.75                          | 0.68   | 2.22  | 1.47    | HT1     |
| A109V    | 0.62                          | -0.94  | 0.24  | 0.15    | HT1     |
| G89R     | 2.29                          | -0.21  | -0.04 | -1.39   | HT1     |

**Table S2. Computational prediction of mutations that impair bicarbonate-induced MPK12–HT1 interaction.** Effect on free energy of MPK12 – HT1 interaction derived from several predicted mutations of either MPK12 or HT1 using four different methods: Mutabind2, GeoPPI, MOE residue scan, and lowmode MOE. Increasing positive values indicate increasingly destabilized MPK12 – HT1 interaction. (see Methods for details).

|                   |                                               |
|-------------------|-----------------------------------------------|
| MPK4.user.Fw      | ggcttaauATGTCGGCGGAGAGTTG                     |
| MPK4.user.Rv      | ggtttaauCACTGAGTCTTGAGGATTG                   |
| MPK12.user.F54    | ggcttaauATGTCTGGAGAATCAAGCTC                  |
| MPK12.user.R54    | ggtttaauGTGGTCAGGATTGAATTTGAC                 |
| MPK12_InF_pET_F   | catggctgatatcgatccATGTCTGGAGAATCAAGCTC        |
| MPK12_InF_pET_R   | gtcgacggagctcgaattcTCAGTGGTCAGGATTGAATTTG     |
| LongHT1_USER_F    | ggcttaauATGTCTGGTTTATGTTTCAATCC               |
| MPK4_user_R       | ggtttaauTCACACTGAGTCTTGAGGATTG                |
| MPK12_user_R      | ggtttaauTCAGTGGTCAGGATTGAATTTGAC              |
| HT1_user_R        | ggtttaauTCAGGCATTTACAGGAACAGAG                |
| HT1.pET.InF.F     | gctgatatcgatccATGGAGAAGAAGAGATTTGAC           |
| HT1.pET.InF.R     | cggagctcgaattcGGCATTTCACAGGAACAGAG            |
| HT1long_pET_InF_F | gctgatatcgatccATGTCTGGTTTATGTTTCAATCC         |
| CBC1_USER_F       | ggcttaauATGAAGGAGAAGGCGGAG                    |
| CBC1_USER_R       | ggtttaauTGGGCCTCGGTGTCTCG                     |
| CBC2_USER_F       | ggcttaauATGAAAGAAGGAAAGGATGGG                 |
| CBC2_USER_R       | ggtttaauAGGACCACGTTTCCTTCG                    |
| CBC1_S280A_F      | GTGGCTCGTCTAGAGGCTgCAAACCCTAACGACATGAC        |
| CBC1_S280A_R      | GTCATGTCTGTTAGGGTTTGcAGCCTCTAGACGAGCCAC       |
| CBC1_S43&45A_F    | GGACGATGGAGAAGAGGAAGgcTTTGgcTGATGGTGAAGATAACG |
| CBC1_S43&45A_R    | CGTTATCTTCACCATCAgcCAAAgcCTTCCTCTTCTCCATCGTCC |
| CBC1_T256A_Fw     | GATTGTGCATAGAGACGTGAAAgCGGAGAACATGCTTTTAG     |
| CBC1_T256A_Rv     | CTAAAAGCATGTTCTCCGcTTTCACGTCTCTATGCACAATC     |
| CBC1_D253A_F      | CTCAGAAGATTGTGCATAGAGcCGTGAAAACGGAGAAC        |
| CBC1_D253A_R      | GTTCTCCGTTTTTCACGgCTCTATGCACAATCTTCTGAG       |
| HT1_A109A_Fw      | gggatctacaaacaagagTcggtgccgtgaagatggtg        |
| HT1_A109A_Rv      | caccatcttcacggcaacgActctttgtttgtagatccc       |
| HT1_G89R_Fw       | GATCTTTTCGAGCTATTTATCaGAAACAAATTTGCTTCCGG     |
| HT1_G89R_Rv       | CCGGAAGCAAATTTGTTTCtGATAAATAGCTGCGAAAGATC     |
| HT1_R173Q_Fw      | GTCACAAGGAAACCTCCaAATGTACCTAAACAAGAAAGAG      |
| HT1_R173Q_Rv      | CTCTTTCTTGTTTAGGTACATTtGGAGGTTTCCTTGTGAC      |
| MPK12_Y277G_Fw    | GCAGTGACAACGCAAGAAGAggCGTCAGGCAACTTCCGCG      |
| MPK12_Y277G_Rv    | CGCGGAAGTTGCCTGACGccTCTTCTTGCGTTGTCACTGC      |

**Table S3. Primer sequences used in this study.**
